# Supplementary material for: Evaluation of CRISPR/Cas9 Constructs in Wheat Cell Suspension Cultures
Source: MDPI journal article supplement (doi:10.3390/ijms24032162), 2023-01-21
Supplement: s1 [file s1]

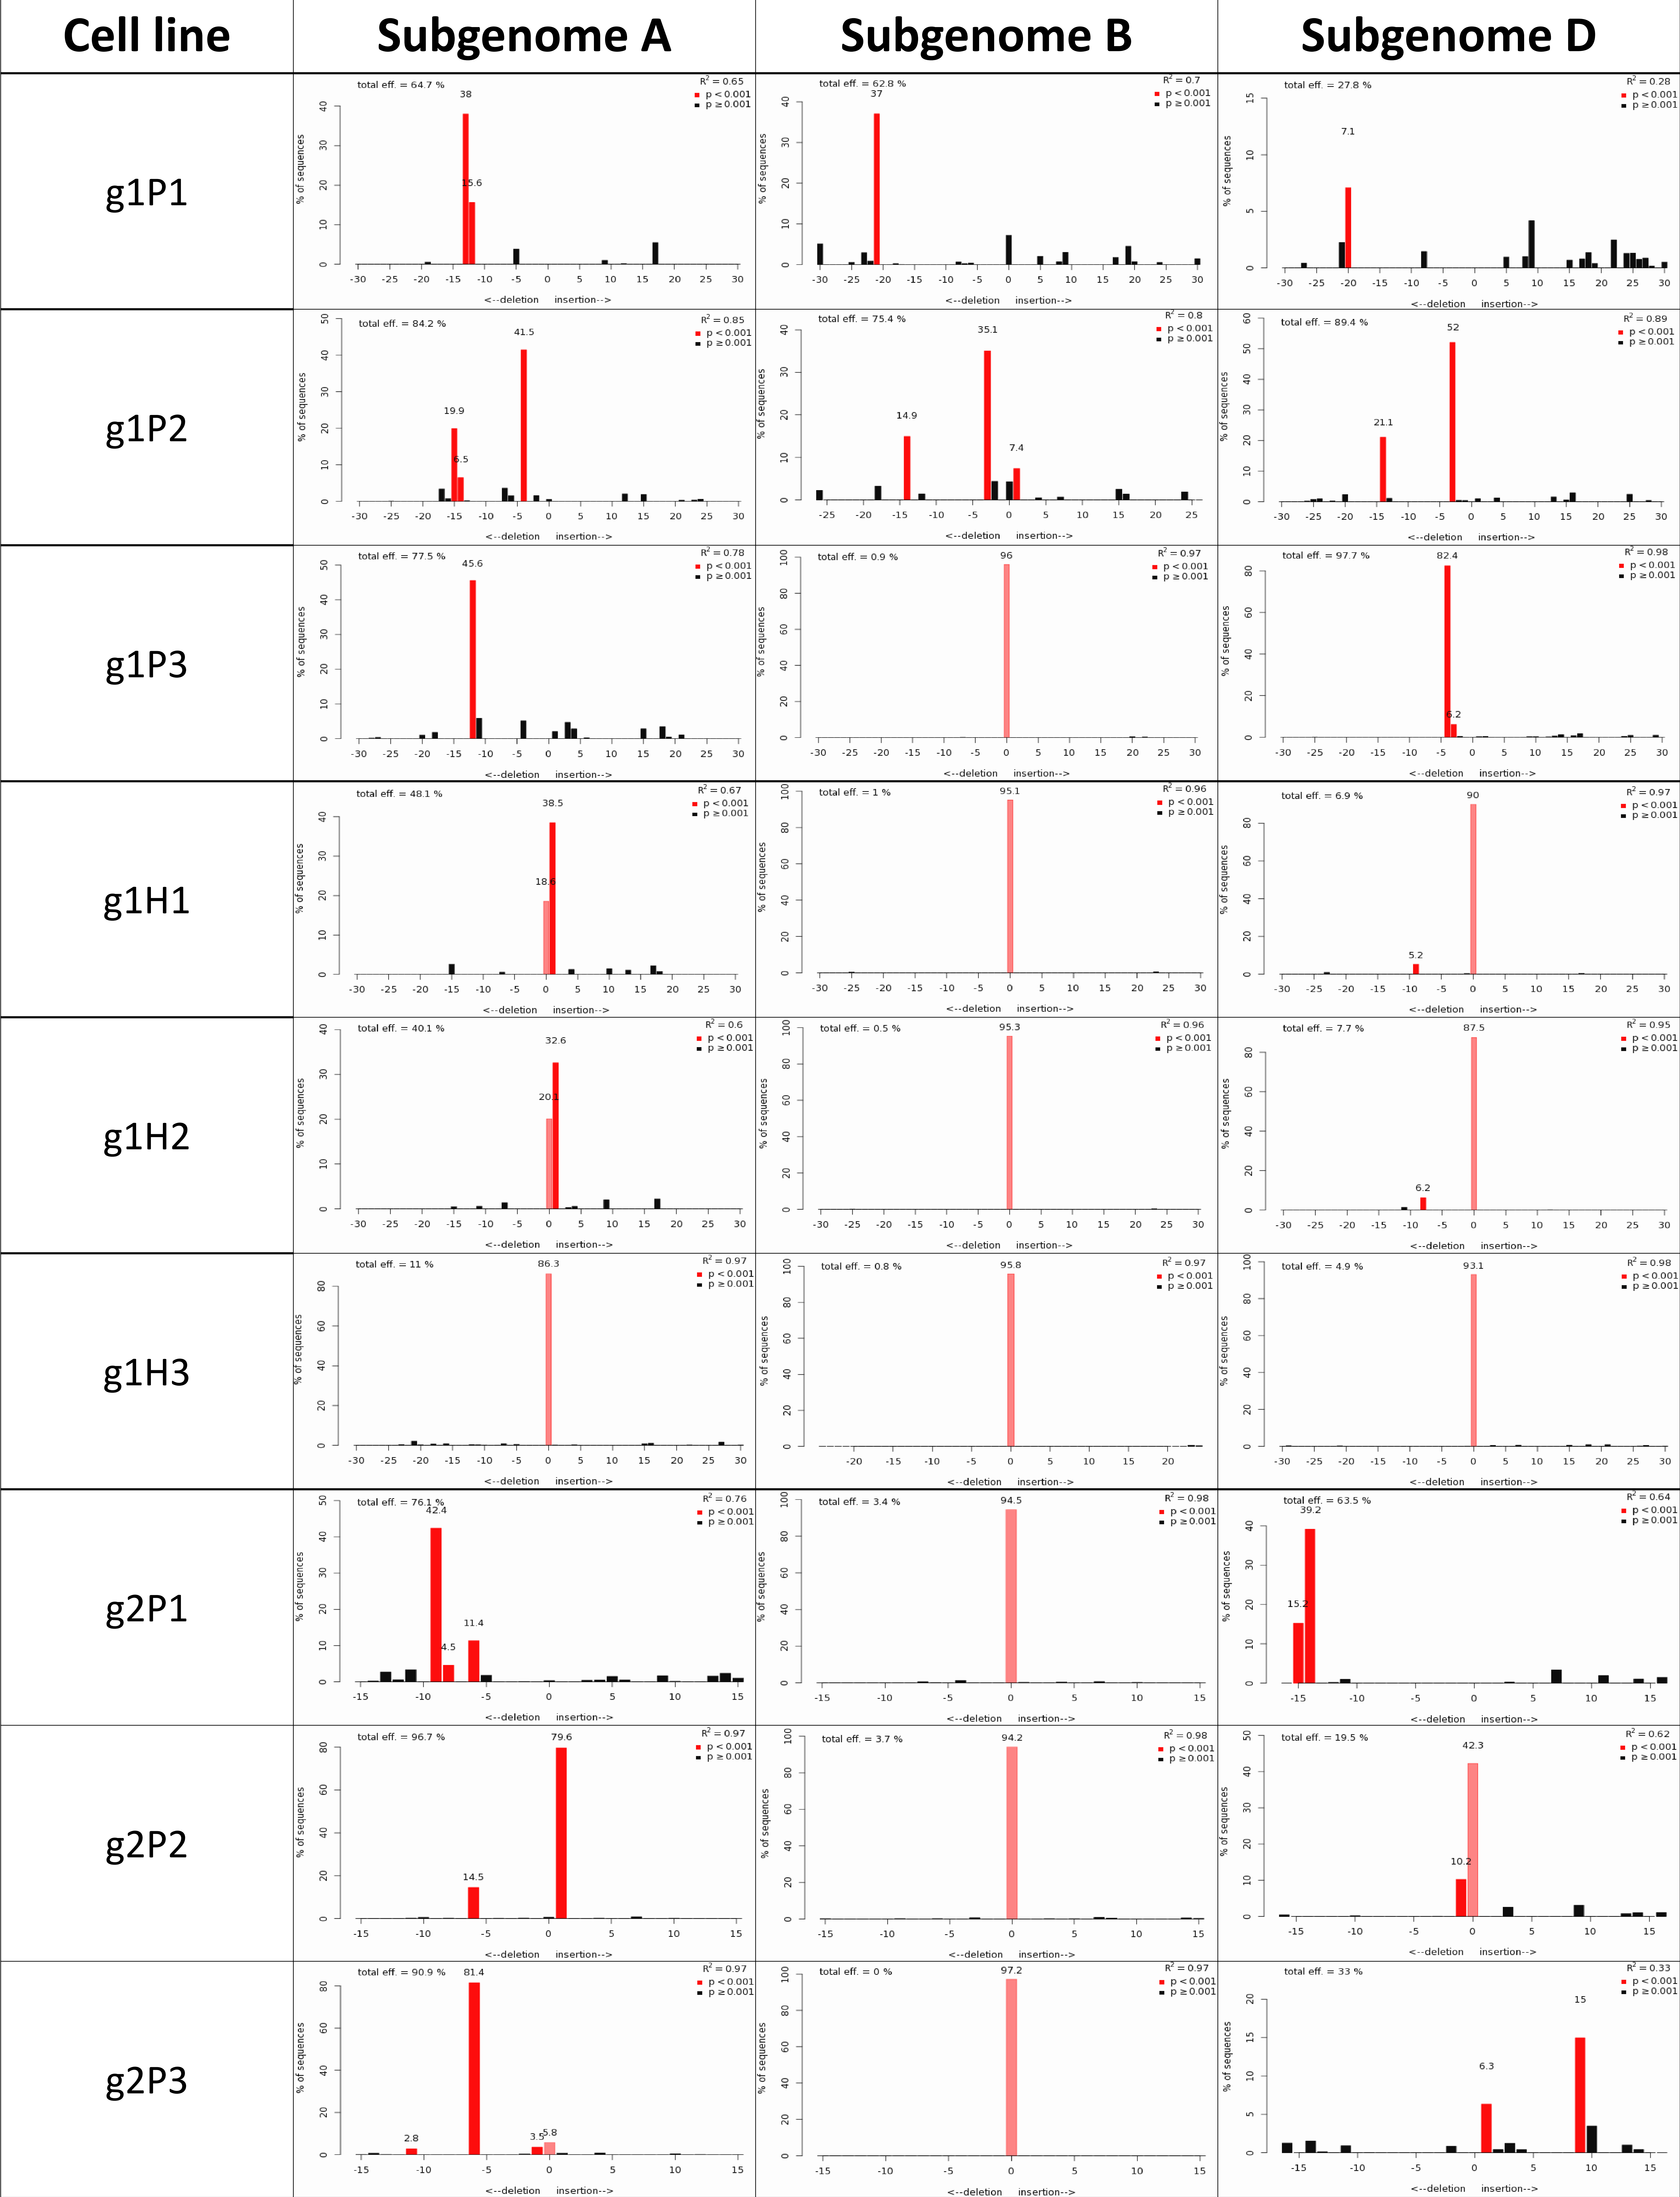

Supplementary Figure S1 – TIDE-generated indel spectra for all tested cell lines. Total efficiency of mutagenesis and frequency of indels shown on particular graphs.
